# Supplementary material for: Spatiotemporally Mapping Non-Grain Production of Winter Wheat Using a Developed Auto-Generating Sample Algorithm on Google Earth Engine
Source: MDPI journal article supplement (doi:10.3390/rs16040659), 2024-02-11
Supplement: s1 [file s1]

## Supplementary materials.

Table S1. The different thresholds created based on intersection criteria within the 5th category.

| Intersection criteria |   | $\geq$ SAD | $\leq$ ED | $\leq$ NIRDI |
|-----------------------|---|------------|-----------|--------------|
| Different thresholds  | 1 | 0.711334   | 0.255404  | 0.123792     |
|                       | 2 | 0.841261   | 0.154632  | 0.038597     |
|                       | 3 | 0.910196   | 0.087881  | -0.011961    |
|                       | 4 | 0.968734   | 0.048331  | -0.055219    |

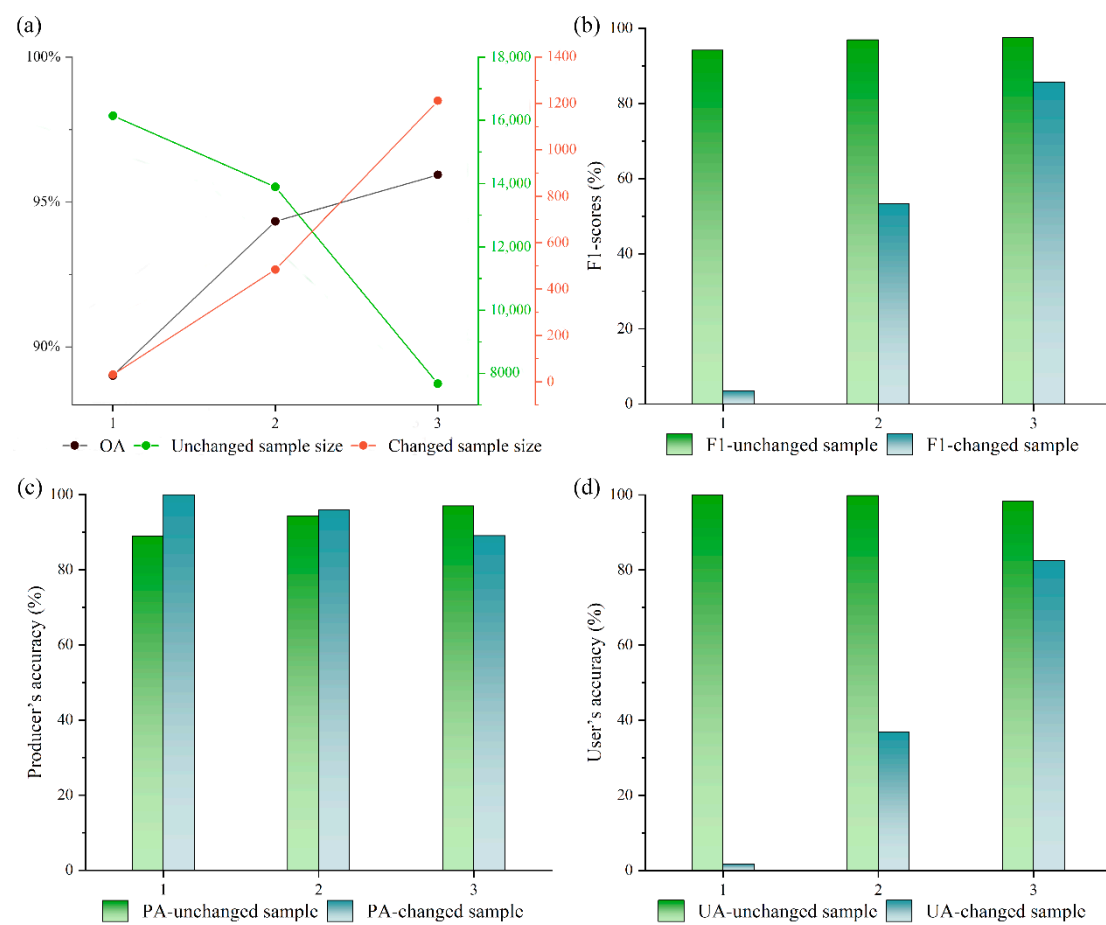

Figure S1. Variation of sample size and OA with different thresholds (a), F1 score (b), the PA (c), and the UA (d) within the 5th category.

Table S2. The different thresholds created based on intersection criteria within the 6th category.

| Intersection criteria |   | $\geq$ SAD | $\leq$ ED | $\leq$ NIRDI |
|-----------------------|---|------------|-----------|--------------|
| Different thresholds  | 1 | 0.678546   | 0.286300  | 0.174763     |
|                       | 2 | 0.821519   | 0.201513  | 0.066015     |

|   |          |          |           |
|---|----------|----------|-----------|
| 3 | 0.882851 | 0.130141 | 0.012211  |
| 4 | 0.938139 | 0.078769 | -0.026839 |
| 5 | 0.979912 | 0.044925 | -0.065531 |

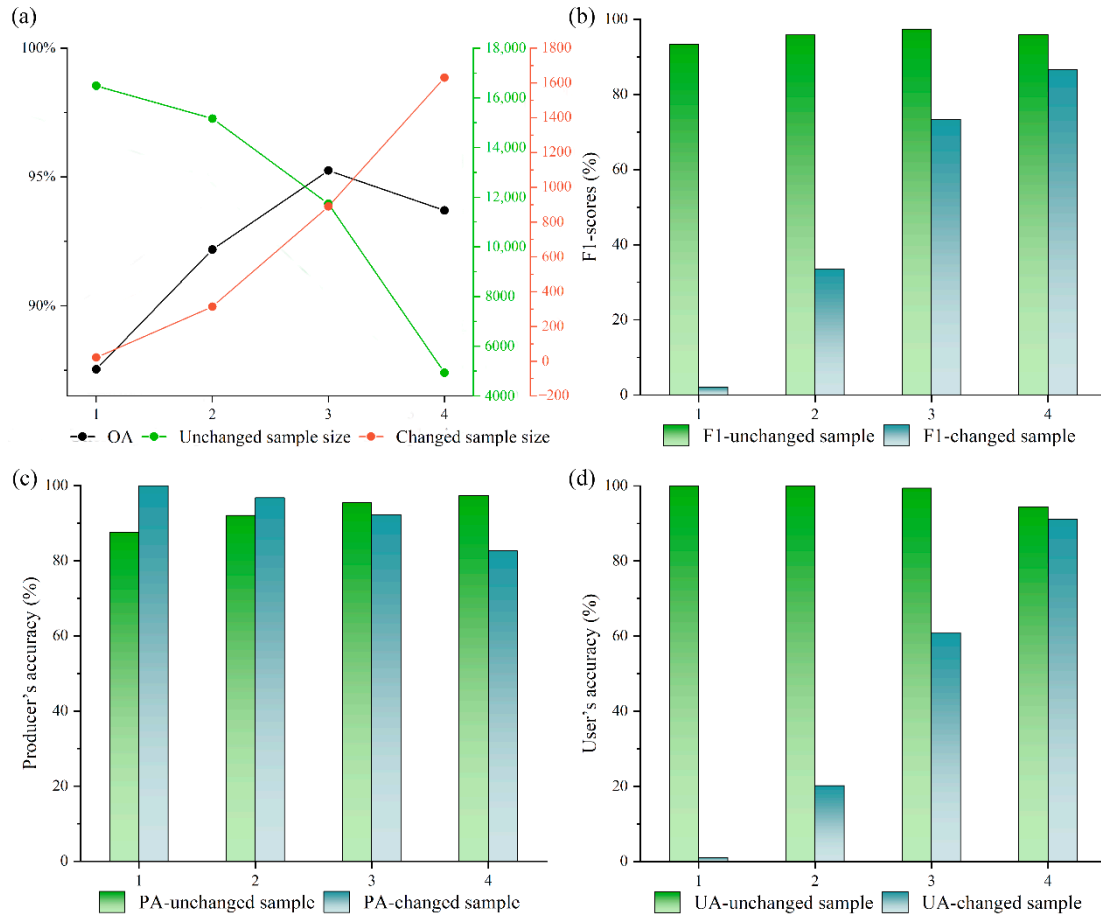

Figure S2. Variation of sample size and OA with different thresholds (a), F1 score (b), the PA (c), and the UA (d) within the 6th category.

Table S3. The different thresholds created based on intersection criteria within the 7th category.

| Intersection criteria |   | $\geq$ SAD | $\leq$ ED | $\leq$ NIRDI |
|-----------------------|---|------------|-----------|--------------|
| Different thresholds  | 1 | 0.678546   | 0.298519  | 0.187111     |
|                       | 2 | 0.819486   | 0.217243  | 0.079779     |
|                       | 3 | 0.877445   | 0.148586  | 0.029577     |
|                       | 4 | 0.926136   | 0.097881  | -0.006297    |
|                       | 5 | 0.966228   | 0.064838  | -0.038210    |
|                       | 6 | 0.990639   | 0.038687  | -0.074414    |

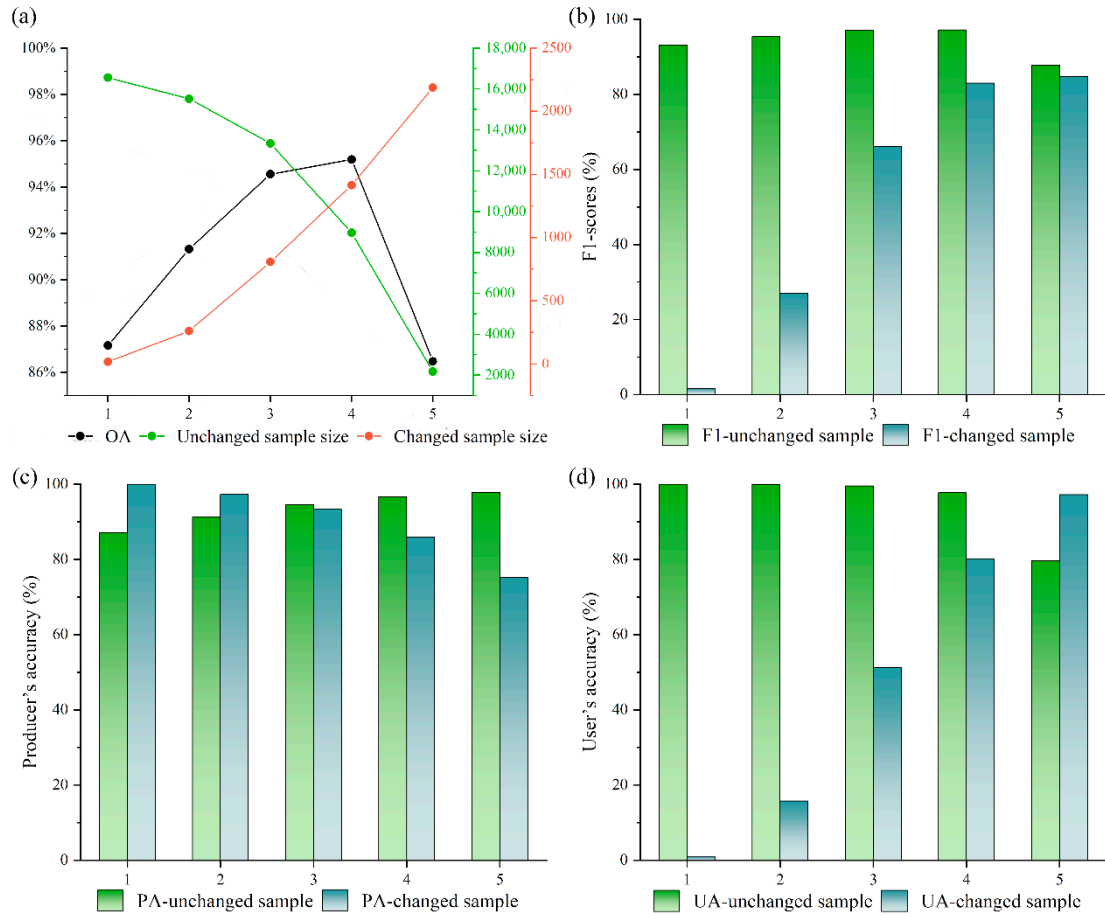

Figure S3. Variation of sample size and OA with different thresholds (a), F1 score (b), the PA (c), and the UA (d) within the 7th category.

Table S4. The different thresholds created based on intersection criteria within the 8th category.

| Intersection criteria |   | $\geq \text{SAD}$ | $\leq \text{ED}$ | $\leq \text{NIRDI}$ |
|-----------------------|---|-------------------|------------------|---------------------|
| Different thresholds  | 1 | 0.678546          | 0.324612         | 0.189861            |
|                       | 2 | 0.806395          | 0.245232         | 0.094986            |
|                       | 3 | 0.854365          | 0.179431         | 0.045816            |
|                       | 4 | 0.895483          | 0.125627         | 0.009172            |
|                       | 5 | 0.934299          | 0.085701         | -0.020019           |
|                       | 6 | 0.968972          | 0.058598         | -0.047354           |
|                       | 7 | 0.991070          | 0.035579         | -0.080216           |

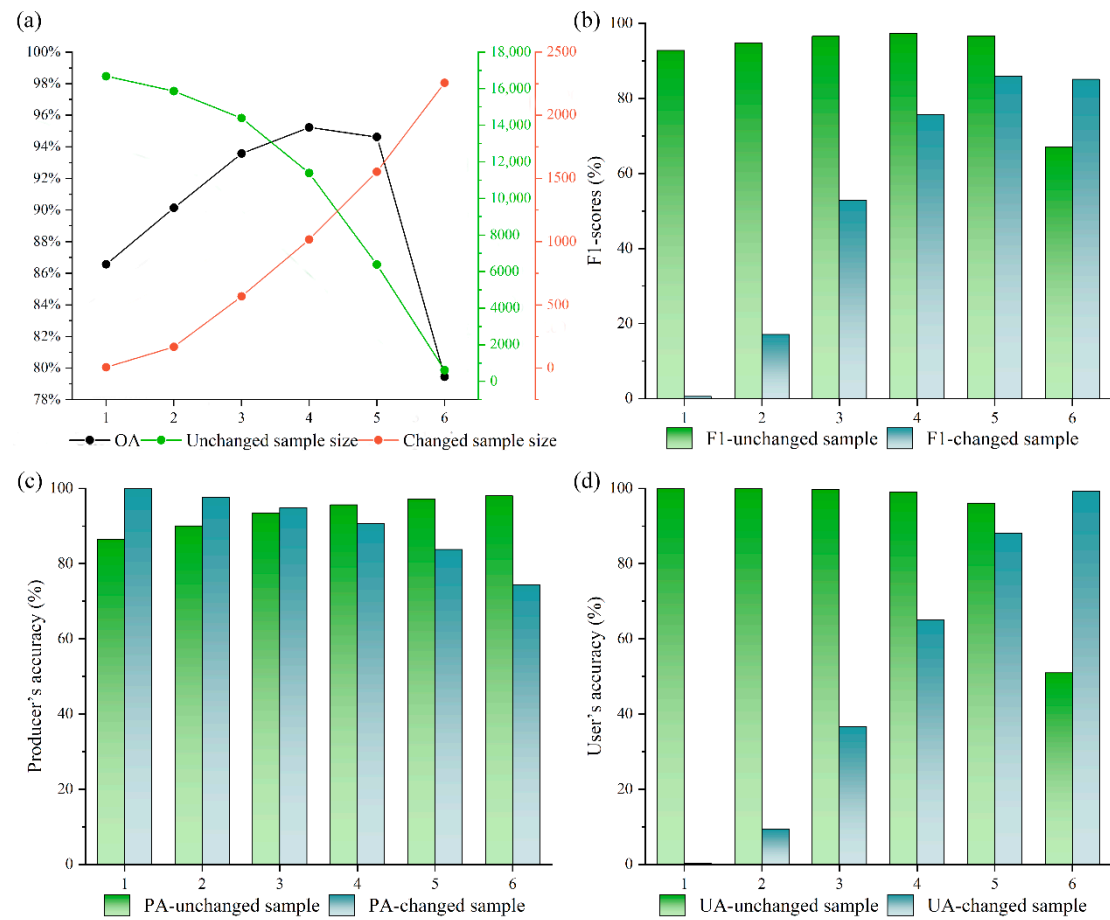

Figure S4. Variation of sample size and OA with different thresholds (a), F1 score (b), the PA (c), and the UA (d) within the 8th category.
